# Supplementary material for: Nervous and Muscular Adverse Events after COVID-19 Vaccination: A Systematic Review and Meta-Analysis of Clinical Trials
Source: MDPI journal article supplement (doi:10.3390/vaccines9080939), 2021-08-23
Supplement: s1 [file s1]

Supplementary Materials

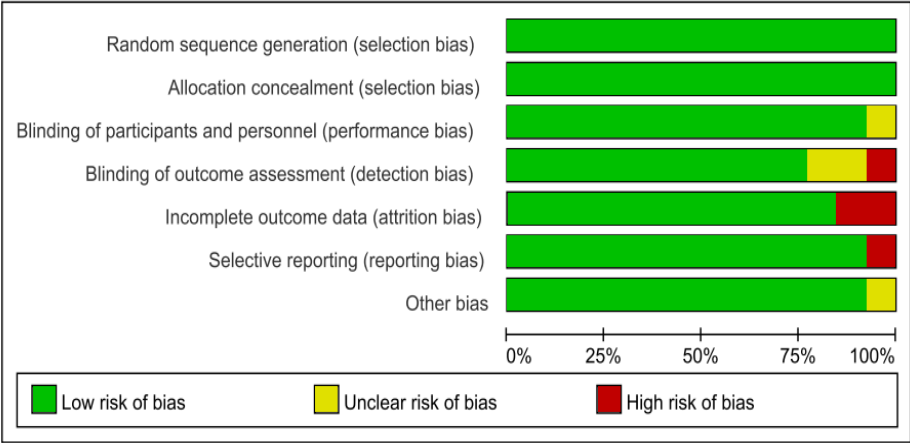

|                       | Random sequence generation (selection bias) | Allocation concealment (selection bias) | Blinding of participants and personnel (performance bias) | Blinding of outcome assessment (detection bias) | Incomplete outcome data (attrition bias) | Selective reporting (reporting bias) | Other bias |
|-----------------------|---------------------------------------------|-----------------------------------------|-----------------------------------------------------------|-------------------------------------------------|------------------------------------------|--------------------------------------|------------|
| Chappell 2021         | +                                           | +                                       | +                                                         | -                                               | +                                        | +                                    | +          |
| Chu 2021              | +                                           | +                                       | +                                                         | ?                                               | +                                        | +                                    | +          |
| Folegatti 2020        | +                                           | +                                       | +                                                         | +                                               | +                                        | +                                    | +          |
| Keech 2020            | +                                           | +                                       | ?                                                         | +                                               | +                                        | +                                    | +          |
| Mulligan 2020         | +                                           | +                                       | +                                                         | +                                               | +                                        | +                                    | +          |
| Raches 2021 & 2021(2) | +                                           | +                                       | +                                                         | +                                               | -                                        | +                                    | +          |
| Richmond 2021         | +                                           | +                                       | +                                                         | +                                               | +                                        | +                                    | ?          |
| Walsh, 2020           | +                                           | +                                       | +                                                         | +                                               | +                                        | +                                    | +          |
| Wu & Zhang 2021       | +                                           | +                                       | +                                                         | +                                               | +                                        | +                                    | +          |
| Xia 2020              | +                                           | +                                       | +                                                         | +                                               | -                                        | +                                    | +          |
| Xia 2020(2)           | +                                           | +                                       | +                                                         | ?                                               | +                                        | -                                    | +          |
| Yang 2021             | +                                           | +                                       | +                                                         | +                                               | +                                        | +                                    | +          |
| Zhu 2020(2)           | +                                           | +                                       | +                                                         | +                                               | +                                        | +                                    | +          |

Figure S1. Risk of bias graph and risk of bias summary of the included studies.

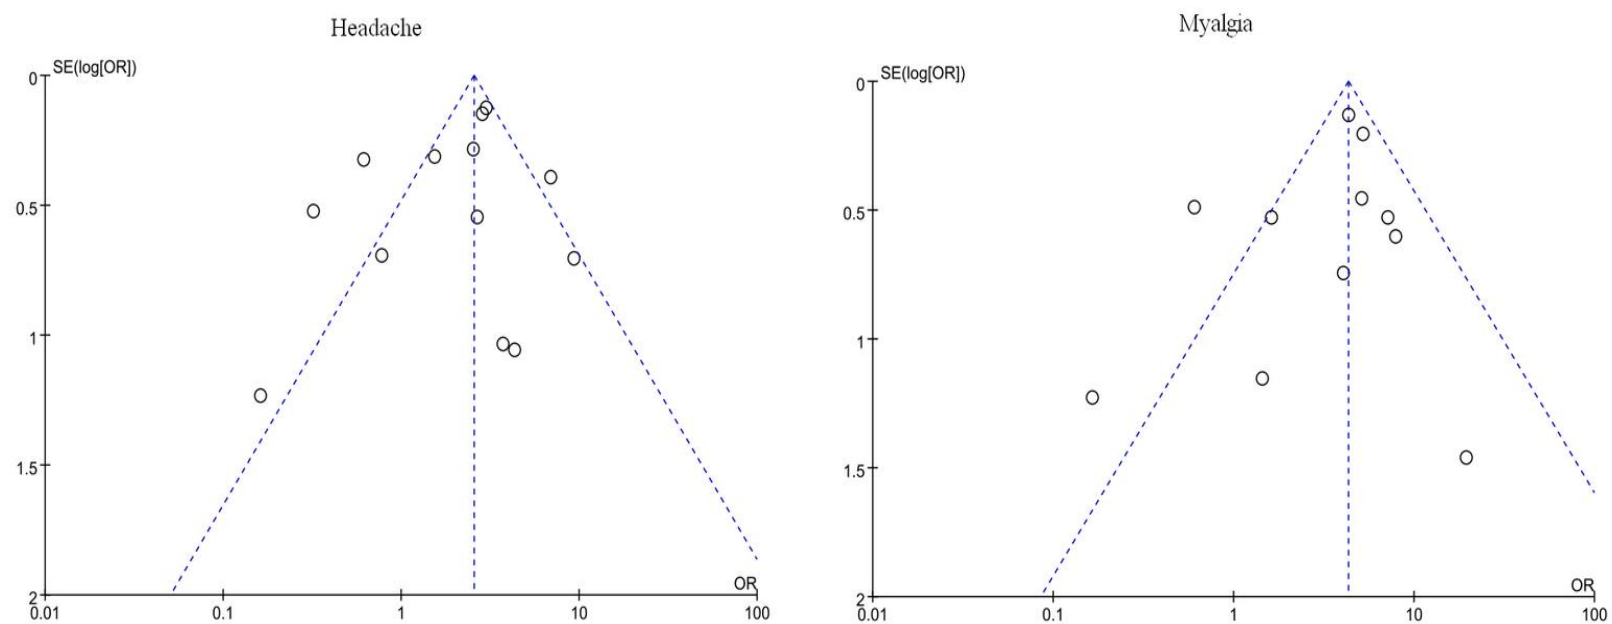

|                                            | Headache | Myalgia |
|--------------------------------------------|----------|---------|
| Begg-Mazumdar rank correlation, $Pr >  z $ | 0.583    | 0.640   |
| Egger's Test, $P >  t $                    | 0.283    | 0.311   |

Figure S2. Funnel diagram, Begg-Mazumdar rank correlation and Egger's bias test of publication bias of headache and myalgia

Table S1. Nervous and muscular adverse events in phase 1/2 randomized, blinded, and controlled clinical trial after COVID-19 vaccination

| Author/ year of published             | Events                                   | No. of events/total (%) |                |
|---------------------------------------|------------------------------------------|-------------------------|----------------|
|                                       |                                          | Vaccine                 | Control        |
| Xia 2020 [1]                          | Headache                                 | 7/432 (1.6)             | 3/144 (2.1)    |
|                                       | Myalgia                                  | 1/432 (0.2)             | 2/144 (1.4)    |
|                                       | Drowsiness                               | 1/432 (0.2)             | 0/144 (0)      |
|                                       | Dizziness                                | 1/432 (0.2)             | 0/144 (0)      |
| Xia 2020(2) [2]                       | Headache                                 | 1/240 (0.4)             | 2/80 (2.5)     |
| Wu 2021 [3] and Zhang 2021 [4]        | Headache                                 | 15/636 (2.4)            | 1/156 (0.6)    |
|                                       | Myalgia                                  | 15/636 (2.4)            | 6/156 (3.8)    |
|                                       | Hypoesthesia                             | 2/636 (0.3)             | 2/156 (1.3)    |
|                                       | Dizziness                                | 2/636 (0.3)             | 0/156 (0)      |
|                                       | Drowsiness                               | 2/636 (0.3)             | 1/156 (0.6)    |
| Raches 2021[5] and Raches 2021(2) [6] | Headache                                 | 15/1347 (1.1)           | 5/148 (3.4)    |
|                                       | Tremor                                   | 4/1347(0.3)             | 0/148 (0)      |
|                                       | Dizziness                                | 1/1347 (0.1)            | 1/148 (0.7)    |
|                                       | Sleep disturbance                        | 1/1347 (0.1)            | 0/148 (0)      |
|                                       | Giddiness                                | 2/1347 (0.1)            | 0/148 (0)      |
|                                       | Vertigo                                  | 0/1347 (0)              | 0/148(0)       |
| Folegatti 2020 [7]                    | Headache                                 | 365/543 (67.2)          | 216/534 (40.4) |
|                                       | Myalgia                                  | 321/543 (59.1)          | 133/534 (24.9) |
|                                       | Feeling abnormal                         | 1/543 (0.2)             | 0/534 (0)      |
|                                       | Muscle spasms/ musculoskeletal stiffness | 2/543 (0.4)             | 0/534 (0)      |
|                                       | Abnormal sleep-related event/ insomnia   | 1/543 (0.2)             | 1/534 (0.2)    |
|                                       | Dysgeusia                                | 0/543 (0)               | 1/534 (0.2)    |
|                                       | Paraesthesia                             | 1/543 (0.2)             | 0/534 (0)      |
|                                       | Dizziness                                | 2/543 (0.4)             | 0/534 (0)      |
| Zhu 2020 [8]                          | Headache                                 | 109/382 (28.5)          | 17/126 (13.5)  |
|                                       | Myalgia                                  | 62/382 (16.2)           | 3/126 (2.4)    |
|                                       | Dizziness                                | 5/382 (1.3)             | 1/126 (0.8)    |
|                                       | Hypersensitivity                         | 0/382 (0)               | 2/126 (1.6)    |
|                                       | Syncope                                  | 2/382 (0.5)             | 0/126 (0)      |
|                                       | Hypoaesthesia                            | 1/382 (0.3)             | 0/126 (0)      |
|                                       | Insomnia                                 | 1/382 (0.3)             | 0/126 (0)      |
|                                       | Somnolence                               | 2/328 (0.5)             | 1/126 (0.8)    |
| Keech 2020 [9]                        | Headache                                 | 66 /189 (30.7)          | 18/70 (25.7)   |
|                                       | Myalgia                                  | 61 /189 (28.4)          | 6 /70 (8.6)    |
| Richmond 2021 [10]                    | Headache                                 | 38/238 (16.0)           | 4 /60 (6.7)    |
|                                       | Myalgia                                  | 29/238 (12.2)           | 2 /60 (3.3)    |
| Chappell 2021 [11]                    | Headache                                 | 34/163 (20.9)           | 21/70 (30.0)   |
|                                       | Myalgia                                  | 18/163 (11.0)           | 5 /70 (7.1)    |
|                                       | Paraesthesia                             | 1/163 (0.6)             | 1/70 (1.4)     |

|                    |                |                |               |
|--------------------|----------------|----------------|---------------|
|                    | Radicular pain | 1/163 (0.6)    | 0/70 (0)      |
| Yang 2021 [12]     | Headache       | 9/1607 (0.6)   | 1/770 (0.1)   |
|                    | Myalgia        | 3/1607 (0.2)   | 1/770 (0.1)   |
| Chu 2021 [13]      | Headache       | 301/796 (37.8) | 69/393 (17.6) |
|                    | Myalgia        | 234/796 (29.4) | 29/393 (7.4)  |
| Walsh 2020 [14]    | Headache       | 136/300 (45.3) | 8/75 (10.7)   |
|                    | Myalgia        | 86/300 (28.7)  | 4/75 (5.3)    |
| Mulligan 2020 [15] | Headache       | 42/60 (70.0)   | 3/15 (20.0)   |
|                    | Myalgia        | 23/60 (38.3)   | 0/15 (0)      |
|                    |                | 2027/6933      | 570/2641      |
|                    |                | (29.2) *       | (21.6) *      |

---

\* compared with control, P<0.05. Except for annotation, the number were person-time.  
Injection of the same person experiencing twice would be recorded as two.

Table S2. The incidences of headache and myalgia with or without prophylactic paracetamol [7]

| Group          |                 | No. of events (%) |              |
|----------------|-----------------|-------------------|--------------|
|                |                 | Headache          | Myalgia      |
| Paracetamol    | Vaccine (n=56)  | 34 (60.7) *       | 27 (48.2) *  |
|                | Control (n=57)  | 21 (36.8)         | 15 (26.3)    |
| No paracetamol | Vaccine (n=487) | 331 (68.0) *      | 294 (60.4) * |
|                | Control (n=477) | 195 (40.9)        | 118 (24.7)   |

\* compared with placebo,  $P < 0.05$ .

Table S3. Nervous and muscular adverse events in phase 1/2 open-label clinical trial  
on COVID-19 vaccination

| Study                                    | Vaccine                                 | Group                                        | No. of events (%)      |                        |                      |
|------------------------------------------|-----------------------------------------|----------------------------------------------|------------------------|------------------------|----------------------|
|                                          |                                         |                                              | Headache               | Myalgia                | Other NMAEs          |
| Logunov 2020 [16]                        | replication-incompetent vectors vaccine | Single rAd26 or rAd5 (n=36)                  | 16 (44.4)              | 8 (22.2)               | NA                   |
|                                          |                                         | rAd26 and rAd5 (n=40)                        | 16 (40.0)              | 11 (27.5)              | NA                   |
| Zhu 2020(2) [17]                         | replication-incompetent vectors vaccine | 5x10 <sup>10</sup> viral particles/mL (n=36) | 14 (38.9)              | 7 (19.4)               | 1 (2.8) <sup>b</sup> |
|                                          |                                         | 1x10 <sup>11</sup> viral particles/mL (n=36) | 11 (30.6)              | 3 (8.3)                | 0 (0)                |
|                                          |                                         | 5x10 <sup>11</sup> viral particles/mL (n=36) | 17 (47.2)              | 8 (22.2)               | 1 (2.8) <sup>b</sup> |
| Jackson 2020 [18] and Anderson 2020 [19] | mRNA                                    | 1 <sup>st</sup> Vaccination (n=85)           | 19 (22.4)              | 14 (17.1)              | 0 (0)                |
|                                          |                                         | 2 <sup>nd</sup> Vaccination (n=82)           | 43 (50.6) <sup>a</sup> | 45 (54.9) <sup>a</sup> | 2 (2.4) <sup>c</sup> |
| Total                                    |                                         |                                              | 136/351<br>(38.7)      | 96/351<br>(27.4)       | 4/275<br>(1.5)       |

\* compared with the 1<sup>st</sup> vaccination,  $P < 0.05$ . † dizziness. ‡ syncope and lightheadedness. NMAEs= nervous and muscular adverse events. NA= not available.

Table S4. Headache and myalgia in phase 3 clinical trial on COVID-19 vaccination\*

|          | Inactivated vaccine          |                     |                                                          | Replication-incompetent vectors vaccine                                          |                                                     |                                |                                                 | mRNA vaccine                        |                                     |                                         |                                         | Total               |            |
|----------|------------------------------|---------------------|----------------------------------------------------------|----------------------------------------------------------------------------------|-----------------------------------------------------|--------------------------------|-------------------------------------------------|-------------------------------------|-------------------------------------|-----------------------------------------|-----------------------------------------|---------------------|------------|
|          | Kaabi 2021 [20] <sup>†</sup> |                     |                                                          | Voysey 2020 [21]                                                                 |                                                     | Logunov 2021 [22] <sup>‡</sup> |                                                 | Baden 2020 [23] <sup>§</sup>        |                                     |                                         |                                         |                     |            |
|          | Vaccine                      |                     | Control<br><br>(alum<br>adjuvant<br><br>)<br><br>n=13453 | Vaccine<br><br>(5x10 <sup>10</sup> viral<br>particles/mL<br><br>)<br><br>n=12021 | Control<br><br>(MenACW<br>Y vaccine)<br><br>n=11724 | Vaccine<br><br><br>n=1029      | Control<br><br>(vaccine<br>buffer)<br><br>n=340 | Vaccine                             |                                     | Control                                 |                                         |                     |            |
|          | WIV04<br><br>n=13464         | HB02<br><br>n=13471 |                                                          |                                                                                  |                                                     |                                |                                                 | 1st<br><br>injection<br><br>n=15168 | 2nd<br><br>injection<br><br>n=14677 | 1st<br><br>injectio<br>n<br><br>n=15155 | 2nd<br><br>injectio<br>n<br><br>n=14566 |                     |            |
| Headache | 1733                         | 1761                | 1673                                                     | NA                                                                               | NA                                                  | 30                             | 9                                               | 4951                                | 8602                                | 4027                                    | 3410                                    | 17077/57809         | 9139/43514 |
| No. (%)  | (12.9)                       | (13.1)              | (12.4)                                                   |                                                                                  |                                                     | (2.9)                          | (2.6)                                           | (32.6) <sup>¶</sup>                 | (58.6) <sup>¶,  </sup>              | (26.6)                                  | (23.4)                                  | (29.5) <sup>¶</sup> | (21.0)     |
| Myalgia  | 722                          | 739                 | 730                                                      | 1                                                                                | 0                                                   | 9                              | 3                                               | 3441                                | 8508                                | 2071                                    | 1809                                    | 13420/69830         | 4613/55238 |
| No. (%)  | (5.4)                        | (5.5)               | (5.4)                                                    | (<0.1)                                                                           | (0)                                                 | (0.9)                          | (0.9)                                           | (22.7) <sup>¶</sup>                 | (58.0) <sup>¶,  </sup>              | (13.7)                                  | (12.4)                                  | (19.2) <sup>¶</sup> | (8.4)      |

\* Studies contained data of phase 3, and partly contained phase 1 and/or 2. <sup>†</sup> Observation was seven days. And a participant was only counted once in the specific reaction category even though a participant could have more than 1 adverse reaction. <sup>‡</sup> Adverse events registered during the analyzed period and the subjects were over 60 years old in the vaccine/control group. <sup>§</sup> Solicited NMAEs within 7 days after vaccination in safety set were counted. <sup>¶</sup> Compared with control, P<0.05. <sup>||</sup> Compared with the 1<sup>st</sup> injection, P<0.05. NA= not available.

Table S5. Headache and myalgia subgroup in study of Baden 2020 [23] \*

|                 | mRNA vaccine             |                          |                          |                          |                         |                         |                         |                         |
|-----------------|--------------------------|--------------------------|--------------------------|--------------------------|-------------------------|-------------------------|-------------------------|-------------------------|
|                 | 18~65 years old          |                          |                          |                          | ≥65 years old           |                         |                         |                         |
|                 | Vaccine                  |                          | Control                  |                          | Vaccine                 |                         | Control                 |                         |
|                 | 1st injection<br>n=11406 | 2nd injection<br>n=10985 | 1st injection<br>n=11407 | 2nd injection<br>n=10918 | 1st injection<br>n=3762 | 2nd injection<br>n=3692 | 1st injection<br>n=3748 | 2nd injection<br>n=3648 |
| <b>Headache</b> | 4030                     | 6898                     | 3304                     | 2760                     | 921                     | 1704                    | 723                     | 650                     |
| <b>No. (%)</b>  | (35.3) <sup>†,§</sup>    | (62.8) <sup>†,‡,§</sup>  | (29.0)                   | (25.3)                   | (24.5)                  | (46.2) <sup>†,‡</sup>   | (19.3)                  | (17.8)                  |
| <b>Myalgia</b>  | 2699                     | 6769                     | 1628                     | 1411                     | 742                     | 1739                    | 443                     | 398                     |
| <b>No. (%)</b>  | (23.7) <sup>†,§</sup>    | (61.6) <sup>†,‡,§</sup>  | (14.3)                   | (12.9)                   | (19.7) <sup>†</sup>     | (47.1) <sup>†,‡</sup>   | (11.8)                  | (10.9)                  |

\* Solicited NMAEs within 7 days after vaccination in safety set were counted. <sup>†</sup> Compared with corresponding control, P<0.05. <sup>‡</sup> Compared with 1st vaccination of the same group, P<0.05. <sup>§</sup> Compared with older (≥65 years old), P<0.05. No.= number.



## References

1. Xia S.; Zhang Y.; Wang Y.; et al. Wang H.; Yang Y.; Gao G.F.; Tan W.; Wu G.; Xu M.; Lou Z.; et al. Safety and immunogenicity of an inactivated SARS-CoV-2 vaccine, BBIBP-CorV: A randomised, double-blind, placebo-controlled, phase 1/2 trial. *Lancet Infect. Dis.* **2021**, *21*, 39–51.
2. Xia S.; Duan K.; Zhang Y.; Zhao D.; Zhang H.; Xie Z.; Li X.; Peng C.; Zhang Y.; Zhang W.; et al. Effect of an inactivated vaccine against SARS-CoV-2 on safety and immunogenicity outcomes: Interim analysis of 2 randomized clinical trials. *JAMA* **2020**, *324*, 951–960.
3. Wu Z.; Hu Y.; Xu M.; et al. Chen Z.; Yang W.; Jiang Z.; Li M.; Jin H.; Cui G.; Chen P.; et al. Safety, tolerability, and immunogenicity of an inactivated SARS-CoV-2 vaccine (CoronaVac) in healthy adults aged 60 years and older: A randomised, double-blind, placebo-controlled, phase 1/2 clinical trial. *Lancet Infect. Dis.* **2021**, *21*, 803–812.
4. Zhang Y.; Zeng G.; Pan H.; Li C.; Hu Y.; Chu K.; Han W.; Chen Z.; Tang R.; Yin W.; et al. Safety, tolerability, and immunogenicity of an inactivated SARS-CoV-2 vaccine in healthy adults aged 18–59 years: A randomised, double-blind, placebo-controlled, phase 1/2 clinical trial. *Lancet Infect. Dis.* **2021**, *21*, 181–192.
5. Raches E.; Mohan K.V.; Harsh J.; et al. Sai P.; Siddharth R.; Vamshi S.; Brunda G.; Gajanan S.; Pragya Y.; Priya A.; et al. (2021). Safety and immunogenicity of an inactivated SARS-CoV-2 vaccine, BBV152: A double-blind, randomised, phase 1 trial. *Lancet Infect. Dis.* **2021**, *21*, 637–646.
6. Raches E.; Siddharth R.; Harsh J.; Vamshi S.; Brunda G.; Sai P.; Dipankar D.; Dugyala R.; Usha P.; Gajanan S.; et al. Safety and immunogenicity of an inactivated SARS-CoV-2 vaccine, BBV152: Interim results from a double-blind, randomised, multicentre, phase 2 trial, and 3-month follow-up of a double-blind, randomised phase 1 trial. *Lancet Infect. Dis.* **2021**, *21*, 950–961.
7. Folegatti P.M.; Ewer K.J.; Aley P.K.; Angus B.; Becker S.; Belij-Rammerstorfer S.; Bellamy D.; Bibi S.; Bittaye M.; Clutterbuck E.A.; et al. Safety and immunogenicity of the ChAdOx1 nCoV-19 vaccine against SARS-CoV-2: A preliminary report of a phase 1/2, single-blind, randomised controlled trial. *Lancet* **2020**, *396*, 467–478.
8. Zhu F.; Guan X.; Li Y.; Huang J.; Jiang T.; Hou L.; Li J.; Yang B.; Wang L.; Wang

- We.; et al. Immunogenicity and safety of a recombinant adenovirus type-5-vectored COVID-19 vaccine in healthy adults aged 18 years or older: A randomised, double-blind, placebo-controlled, phase 2 trial. *Lancet* **2020**, 396, 479–488.
9. Keech C.; Albert G.; Cho I.; Robertson A.; Reed P.; Neal S.; Plested J.S.; Zhu M.; Cloney-Clark S.; Zhou H.; et al. Phase 1–2 trial of a SARS-CoV-2 recombinant spike protein nanoparticle vaccine. *New Engl. J. Med.* **2020**, 383, 2320–2332.
  10. Richmond P.; Hatchuel L.; Dong M.; Ma B.; Hu B.; Smolenov I.; Li P.; Liang P.; Han H.; Liang J., et al. Safety and immunogenicity of S-Trimer (SCB-2019), a protein subunit vaccine candidate for COVID-19 in healthy adults: A phase 1, randomised, double-blind, placebo-controlled trial. *Lancet* **2021**, 397, 682–694.
  11. Chappell K.J.; Mordant F.L.; Li Z.; Wijesundara D.K.; Ellenberg P.; Lackenby J.A.; Cheung S.T.M.; Modhiran N.; Avumegah M.S.; Henderson C.L.; et al. Safety and immunogenicity of an MF59-adjuvanted spike glycoprotein-clamp vaccine for SARS-CoV-2: A randomised, double-blind, placebo-controlled, phase 1 trial. *Lancet Infect. Dis.* **2021**; doi:10.1016/S1473-3099(21)00200-0.
  12. Yang S.; Li Y.; Dai L.; et al. Wang J.; He P.; Li C.; Fang X.; Wang C.; Zhao X.; Huang E.; et al. Safety and immunogenicity of a recombinant tandem-repeat dimeric RBD-based protein subunit vaccine (ZF2001) against COVID-19 in adults: Two randomised, double-blind, placebo-controlled, phase 1 and 2 trials. *Lancet Infect. Dis.* **2021**, 21, 1107–1119.
  13. Chu L.; McPhee R.; Huang W.; Bennett H.; Pajon R.; Nestorova B.; Leav B.; mRNA-1273 Study Group. A preliminary report of a randomized controlled phase 2 trial of the safety and immunogenicity of mRNA-1273 SARS-CoV-2 vaccine. *Vaccine* **2021**, 39, 2791–2799.
  14. Walsh E.E.; Frenck R.W.; Falsey A.R.; Kitchin N.; Absalon J.; Gurtman A.; Lockhart S.; Neuzil K.; Mulligan M.J.; Bailey R.; et al. Safety and immunogenicity of two RNA-based Covid-19 vaccine candidates. *New Engl. J. Med.* **2020**, 383, 2439–2450.
  15. Mulligan M.J.; Lyke K.E.; Kitchin N.; Absalon J.; Gurtman A.; Lockhart S.; Neuzil K.; Raabe V.; Bailey R.; Swanson K.A.; et al. Phase I/II study of COVID-19 RNA vaccine BNT162b1 in adults. *Nature* **2020**, 586, 589–593.
  16. Logunov D.Y.; Dolzhikova I.V.; Zubkova O.V.; Tukhvatulin A.I.; Shcheblyakov D.V.; Dzharullaeva A.S.; Grousova D.M.; Erokhova A.S.; Kovyryshina A.V.;

- Botikov A.G.; et al. Safety and immunogenicity of an rAd26 and rAd5 vector-based heterologous prime-boost COVID-19 vaccine in two formulations: Two open, non-randomised phase 1/2 studies from Russia. *Lancet* **2020**, 396, 887–897.
17. Zhu F.; Li Y.; Guan X.; Hou L.; Wang W.; Li J.; Wu S.; Wang B.; Wang Z.; Wang L.; et al. Safety, tolerability, and immunogenicity of a recombinant adenovirus type-5 vectored COVID-19 vaccine: A dose-escalation, open-label, non-randomised, first-in-human trial. *Lancet* **2020**, 395, 1845–1854.
  18. Jackson L.A.; Anderson E.J.; Roupael N.G.; Roberts P.C.; Makhene M.; Coler R.N.; McCullough M.P.; Chappell J.D.; Denison M.R.; Stevens L.J.; et al. An mRNA vaccine against SARS-CoV-2 - preliminary report. *New Engl. J. Med.* **2020**, 383, 1920–1931.
  19. Anderson E.J.; Roupael N.G.; Widge A.T.; Jackson L.A.; Roberts P.C.; Makhene M.; Chappell J.D.; Denison M.R.; Stevens L.J.; Pruijssers A.J.; et al. Safety and immunogenicity of SARS-CoV-2 mRNA-1273 vaccine in older adults. *New Engl. J. Med.* **2020**, 383, 2427–2438.
  20. Kaabi A.I.N.; Zhang Y.; Xia S.; Yang Y.; Al Qahtani M.M.; Abdulrazzaq N.; Al Nusair M.; Hassany M.; Jawad J.S.; Abdalla J.; et al. Effect of 2 inactivated SARS-CoV-2 vaccines on symptomatic COVID-19 infection in adults: A randomized clinical trial. *JAMA* **2021**, 326, 35–45.
  21. Voysey M.; Clemens S.A.C.; Madhi S.A.; Weckx L.Y.; Folegatti P.M.; Aley P.K.; Angus B.; Baillie V.L.; Barnabas S.L.; Bhorat Q.E.; et al. Safety and efficacy of the ChAdOx1 nCoV-19 vaccine (AZD1222) against SARS-CoV-2: An interim analysis of four randomised controlled trials in Brazil, South Africa, and the UK. *Lancet* **2021**, 397, 99–111.
  22. Logunov D.Y.; Dolzhikova I.V.; Shcheblyakov D.V.; Tukhvatulin A.I.; Zubkova O.V.; Dzharullaeva A.S.; Kovyshina A.V.; Lubenets N.L.; Grousova D.M.; Erokhova A.S.; et al. Safety and efficacy of an rAd26 and rAd5 vector-based heterologous prime-boost COVID-19 vaccine: An interim analysis of a randomised controlled phase 3 trial in Russia. *Lancet* **2021**, 397, 671–681.
  23. Baden L.R.; Sahly H.M.; Essink B.; Kotloff K.; Frey S.; Novak R.; Diemert D.; Spector S.A.; Roupael N.; Creech C.B.; et al. Efficacy and safety of the mRNA-1273 SARS-CoV-2 vaccine. *New Engl. J. Med.* **2021**, 384, 403–416.
